# Supplementary material for: Acidochromic spiropyran–merocyanine stabilisation in the solid state
Source: Royal Society of Chemistry journal article supplement (doi:10.1039/c8ce00291f), 2018-01-01
Supplement: c8ce00291f1.pdf [file c8ce00291f1.pdf]

## CrystEngComm - Supporting Information for

## Acidochromic Spiropyran-Merocyanine stabilization in the solid-state

Vanessa Kristina Seiler<sup>a</sup>, Kevin Callebaut<sup>a</sup>, Koen Robeyns<sup>a</sup>, Nikolay Tumanov<sup>b</sup>, Johan Wouters<sup>b</sup>, Benoît Champagne<sup>b</sup> and Tom Leyssens<sup>a,\*</sup>

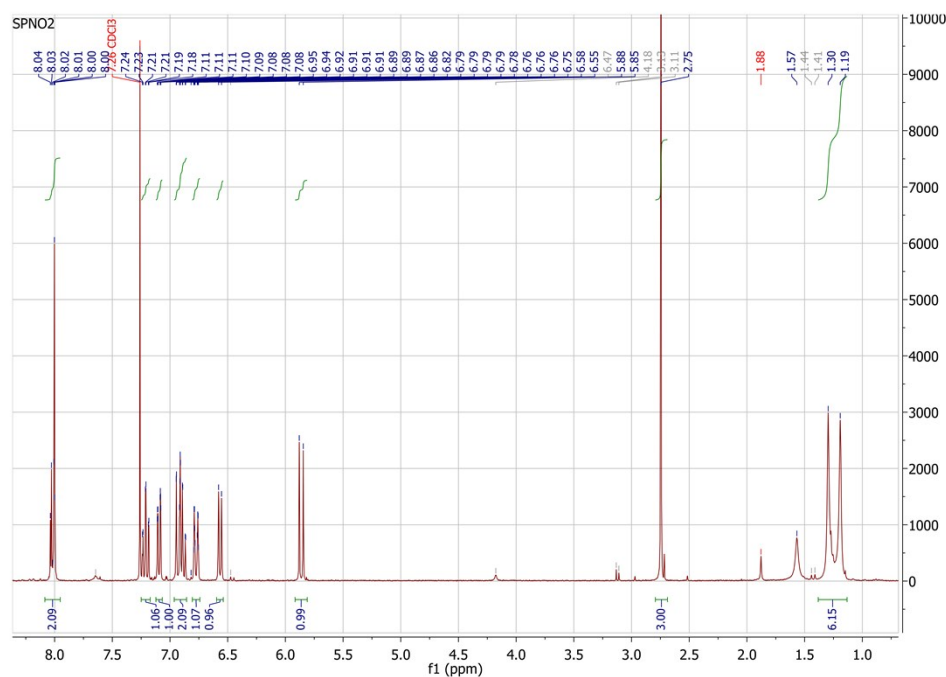

Figure A 1:  $^1\text{H}$ -NMR of **SPNO2**. Traces of  $\text{H}_2\text{O}$  ( $\delta$  (ppm): 1.88) present.

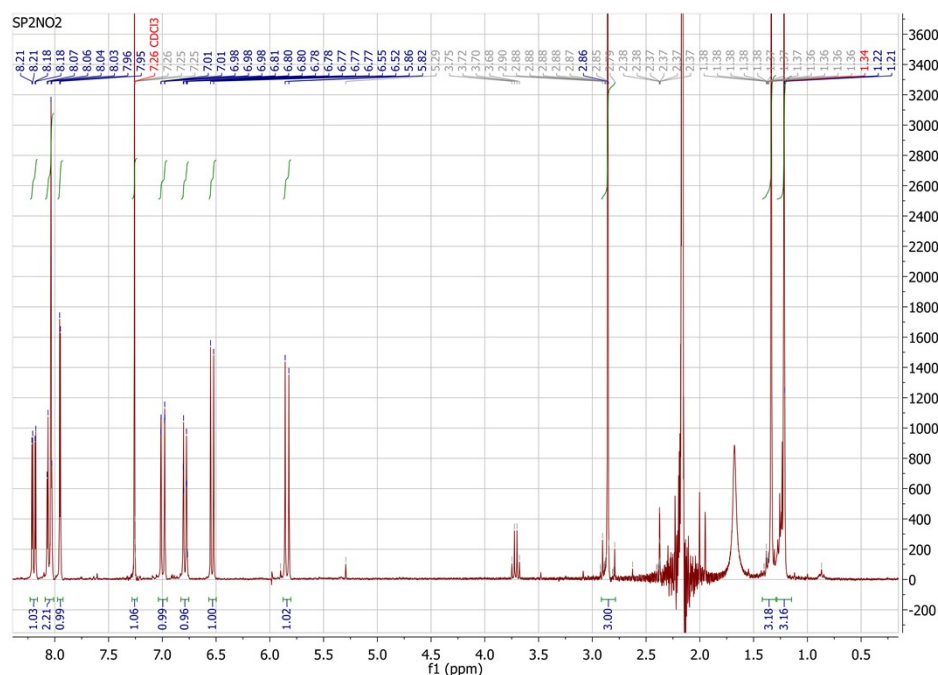

Figure A 2: <sup>1</sup>H-NMR of **SP2NO2**. Traces of H<sub>2</sub>O (δ (ppm): 1.34) and ACN (δ (ppm): 2.2) present. High resolution mass spectra (HRMS; APCI, m/z): calcd for C<sub>19</sub>H<sub>18</sub>O<sub>5</sub>N<sub>3</sub>; 368.12410; found: 368.12392.

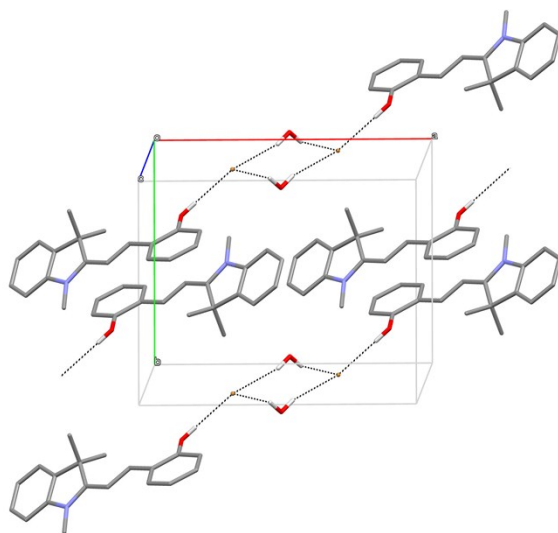

Figure A 3: A partial packing diagram for (Ib'). Hydrogen bonds are indicated as dashed lines.

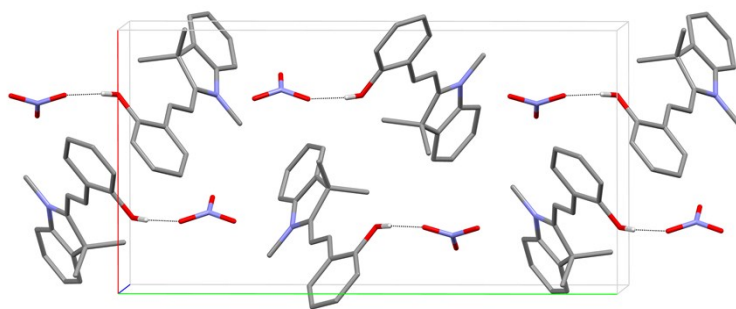

Figure A 4: A partial packing diagram for (Ic). Hydrogen bonds are indicated as dashed lines.

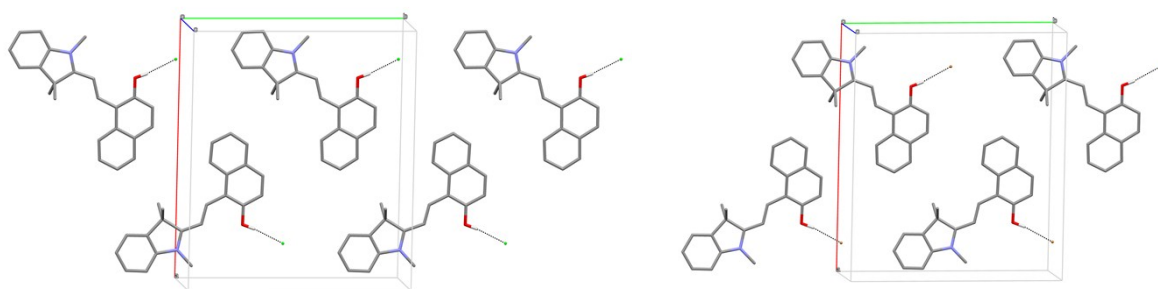

Figure A 5: A partial packing diagram for (IIa; left) and (IIb; right). Hydrogen bonds are indicated as dashed lines.

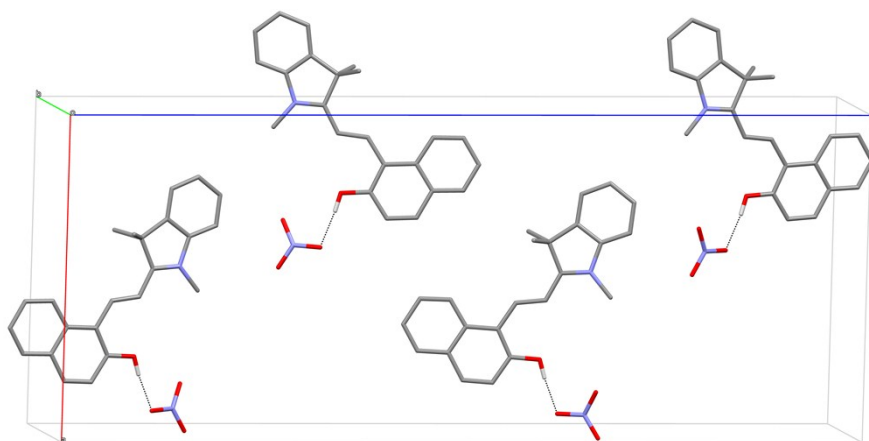

Figure A 6: A partial packing diagram for (IIc). Hydrogen bonds are indicated as dashed lines.

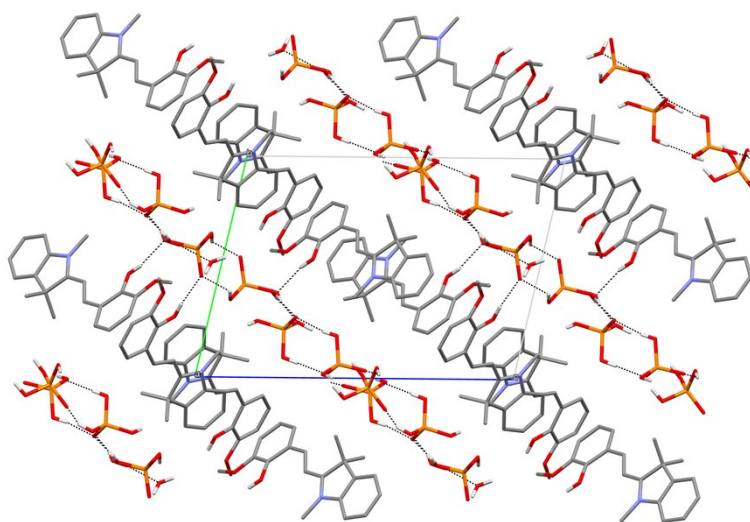

Figure A 7: A partial packing diagram for (IIle). Hydrogen bonds are indicated as dashed lines. Only the major occupied sites of the disordered parts are shown.

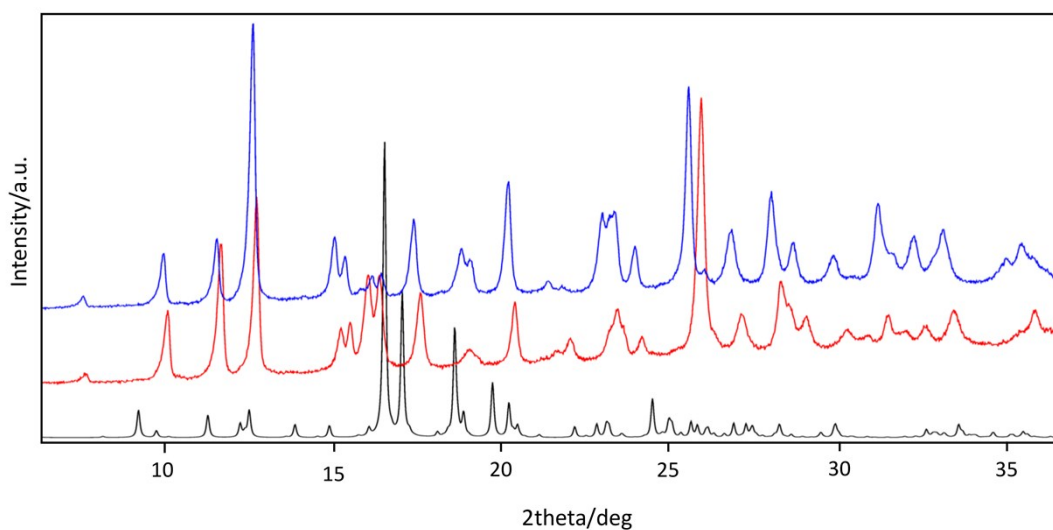

Figure A 8: X-Ray powder diffraction measurement of **SPNO2** (black, simulated powder patterns from single crystal data) in comparison with (IVa; red) and (IVb; blue); measured at room temperature.

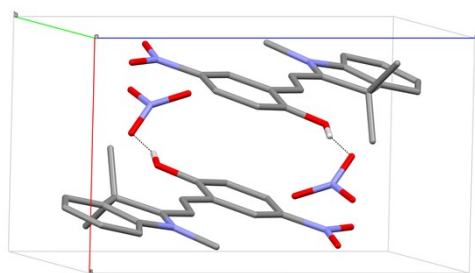

Figure A 9: A partial packing diagram for (IVc). Hydrogen bonds are indicated as dashed lines.

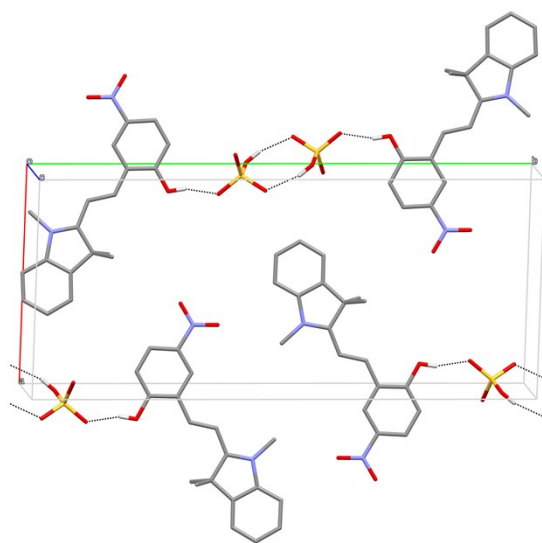

Figure A 10: A partial packing diagram for (IVd). Hydrogen bonds are indicated as dashed lines.

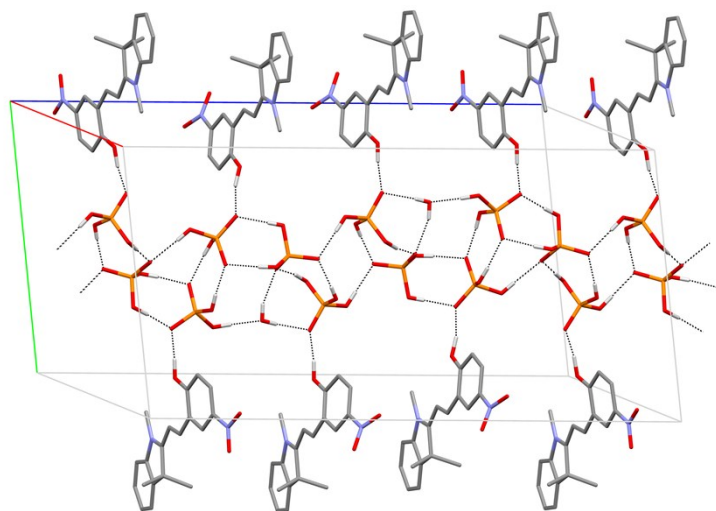

Figure A 11: A partial packing diagram for (IVe). Hydrogen bonds are indicated as dashed lines. Only the major occupied sites of the disordered parts are shown. Solvent molecules are not displayed.

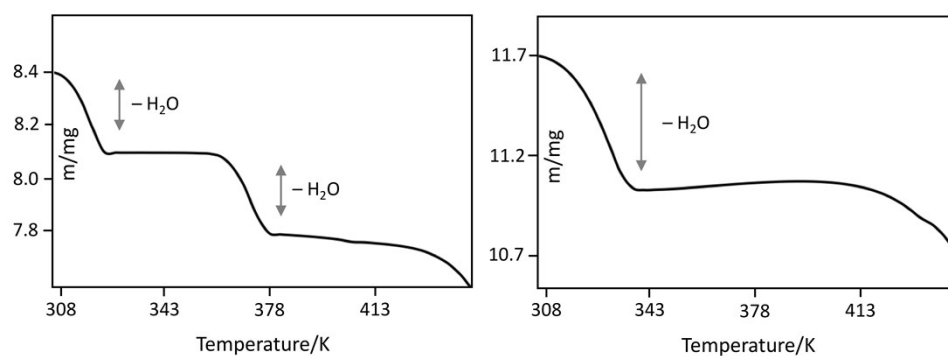

Figure A 12: TGA of (IIIb; left) and (IIIc; right).

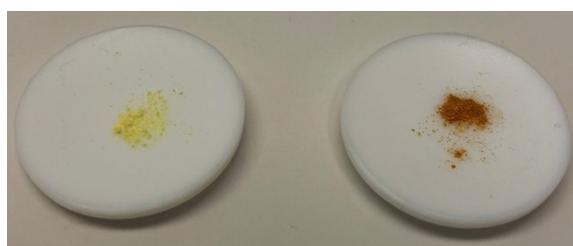

Figure A 13: Visible colour change of **SPNO2** (left) under irradiation at 360 nm for 30 min (left).

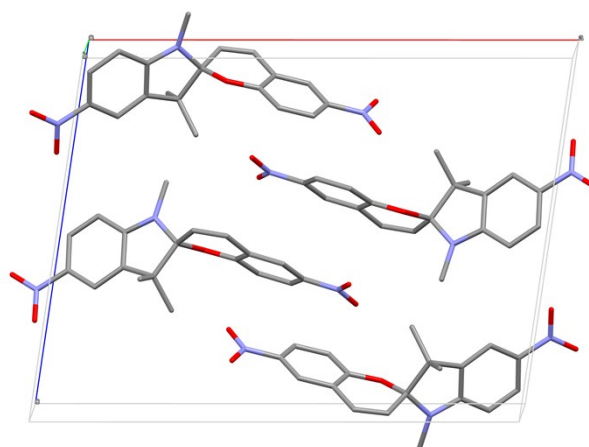

Figure A 14: A partial packing diagram for (V).
